# Supplementary material for: Lymph microvascularization as a prognostic indicator in neuroblastoma
Source: PubMed Central journal article supplement (PMC5995242; doi:10.18632/oncotarget.25457), 2018-05-25
Supplement: oncotarget-09-26157-s001.pdf [file oncotarget-09-26157-s001.pdf]

## **Lymph microvascularization as a prognostic indicator in neuroblastoma**

### **SUPPLEMENTARY MATERIALS**

**Supplementary Table 1: Descriptors of the total vascularization and lymphatic vessel segments variables. See Supplementary\_Table\_1**
